# Supplementary material for: Quantification of Caffeine and Chlorogenic Acid in Green and Roasted Coffee Samples Using HPLC-DAD and Evaluation of the Effect of Degree of Roasting on Their Levels
Source: MDPI journal article supplement (doi:10.3390/molecules26247502), 2021-12-11
Supplement: s1 [file s1]

# Quantification of Caffeine and Chlorogenic Acid in Green and Roasted Coffee Samples Using HPLC-DAD and Evaluate the Effect of Degree of Roasting on Their Levels

Shady Awwad <sup>1,\*</sup>, Reem Issa <sup>2,\*</sup>, Lilian Alnsour <sup>2</sup>, Dima Albals <sup>3</sup> and Idrees Al-Momani <sup>4</sup>

<sup>1</sup> Department of Pharmaceutical Chemistry and Pharmacognosy, Applied Science Private University, Amman 11931, Jordan

<sup>2</sup> Department of Pharmaceutical Sciences, Pharmacological and Diagnostic Research Center (PDRC), Faculty of Pharmacy, Al-Ahliyya Amman University, Amman 19328, Jordan; l.alnsour@ammanu.edu.jo

<sup>3</sup> Department of Medicinal Chemistry and Pharmacognosy, Faculty of Pharmacy, Yarmouk University, Irbid 21163, Jordan; dimabals@yu.edu.jo

<sup>4</sup> Department of Chemistry, Faculty of Science, Yarmouk University, Irbid 21163, Jordan; imomani@yu.edu.jo

\* Corresponding: sh\_awwad@asu.edu.jo (S.A.); r.issa@ammanu.edu.jo (R.I.)

**Table S1:** The Average concentration (%), SD, Min, Max, Median for caffeine and chlorogenic acid content in coffee beans (n=52) obtained from the Jordanian market.

| Caffeine         |                |      |      |      |        |    |
|------------------|----------------|------|------|------|--------|----|
| Data             | Avg. Conc. (%) | SD   | Min  | Max  | Median | N  |
| All              | 1.90           | 0.55 | 0.99 | 3.29 | 1.85   | 52 |
| Brazil           | 2.03           | 0.48 | 0.99 | 2.71 | 2.01   | 15 |
| Colombia         | 1.60           | 0.36 | 1.13 | 2.83 | 1.55   | 17 |
| Ethiopia         | 2.14           | 0.51 | 1.43 | 2.83 | 2.03   | 6  |
| India            | 2.54           | 0.92 | 1.35 | 3.29 | 2.76   | 4  |
| Kenya            | 1.72           | 0.46 | 1.21 | 2.33 | 1.49   | 9  |
| Saudi Arabia     | 2.47           | ---  | 2.47 | 2.47 | 2.47   | 1  |
| Chlorogenic Acid |                |      |      |      |        |    |
| All              | 2.54           | 1.95 | 0.15 | 7.45 | 2.34   | 52 |
| Brazil           | 1.91           | 1.64 | 0.18 | 5.46 | 1.51   | 15 |
| Colombia         | 2.80           | 2.15 | 0.35 | 7.45 | 2.52   | 17 |
| Ethiopia         | 4.08           | 2.06 | 0.62 | 5.84 | 5.06   | 6  |
| India            | 1.48           | 1.13 | 0.15 | 2.91 | 1.43   | 4  |
| Kenya            | 2.36           | 1.95 | 0.50 | 6.09 | 1.71   | 9  |
| Saudi Arabia     | 3.91           | ---  | 3.91 | 3.91 | 3.91   | 1  |

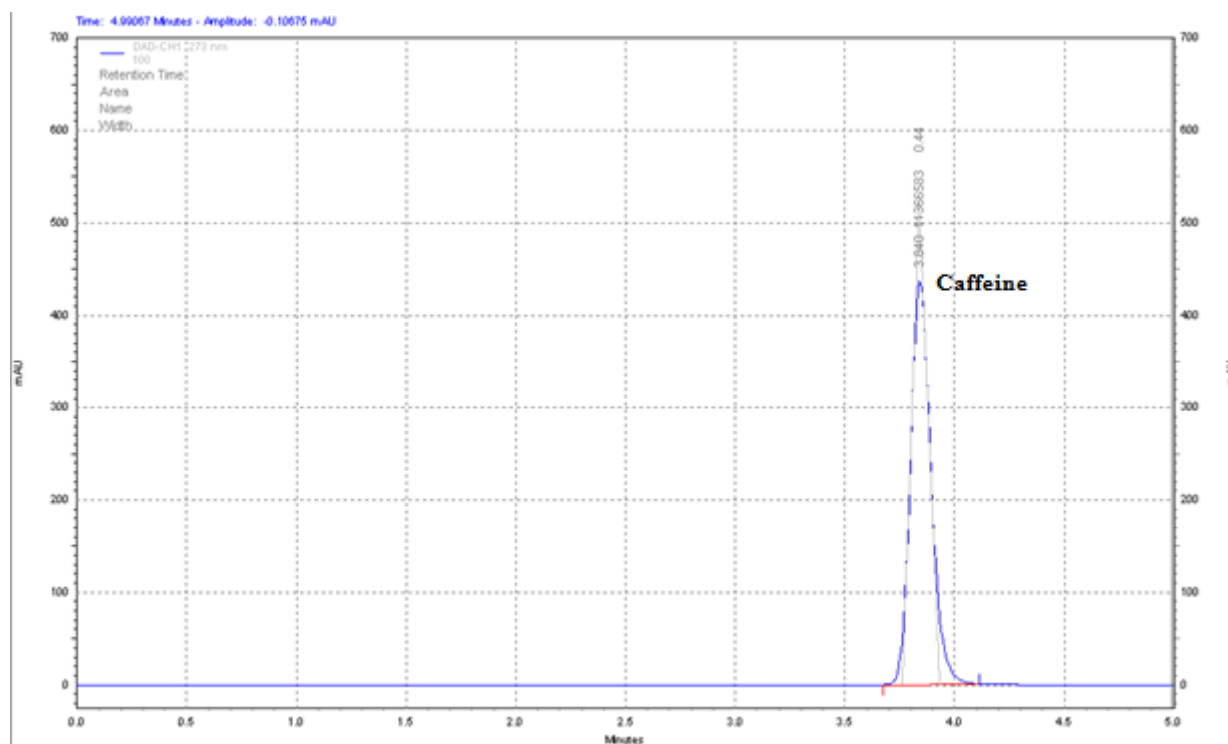

Figure S1: HPLC-DAD chromatogram of caffeine standard dissolved in MeOH:H<sub>2</sub>O [40:60] (Rt = 3.84 min,  $\lambda$  = 273 nm)

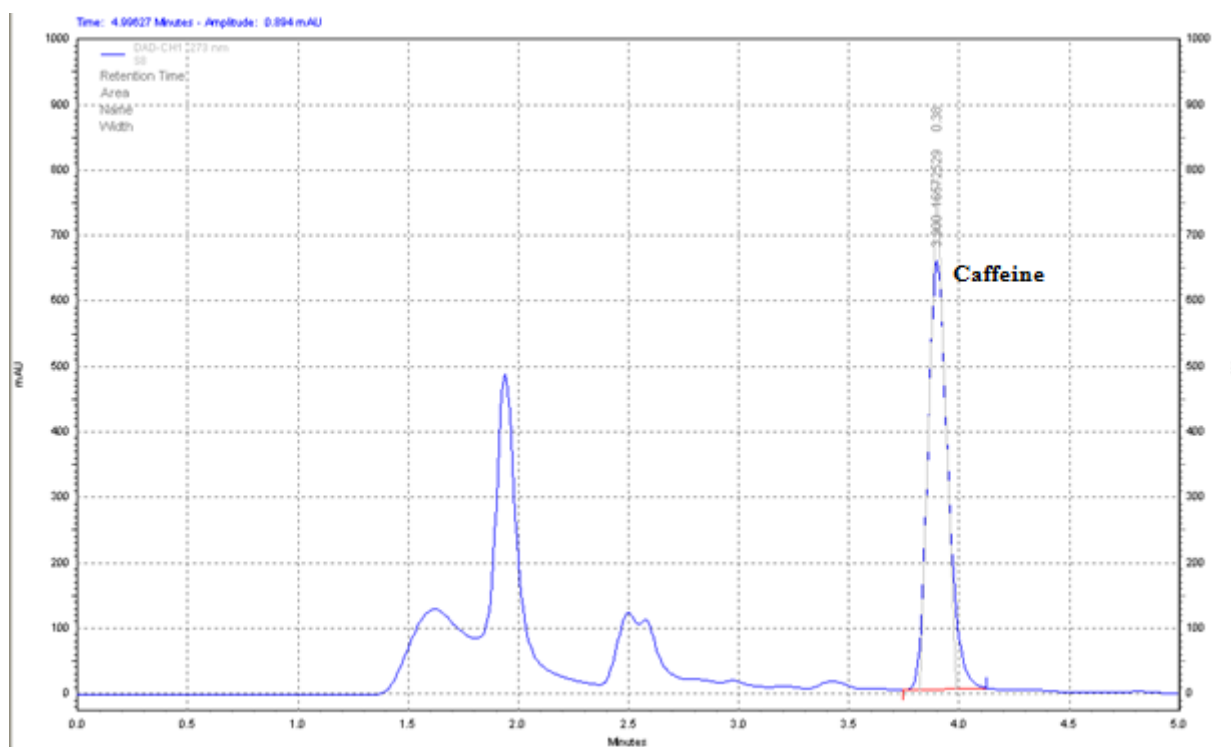

Figure S2: HPLC-DAD chromatogram of caffeine extract sample (Rt = 3.90 min,  $\lambda$  = 273 nm)

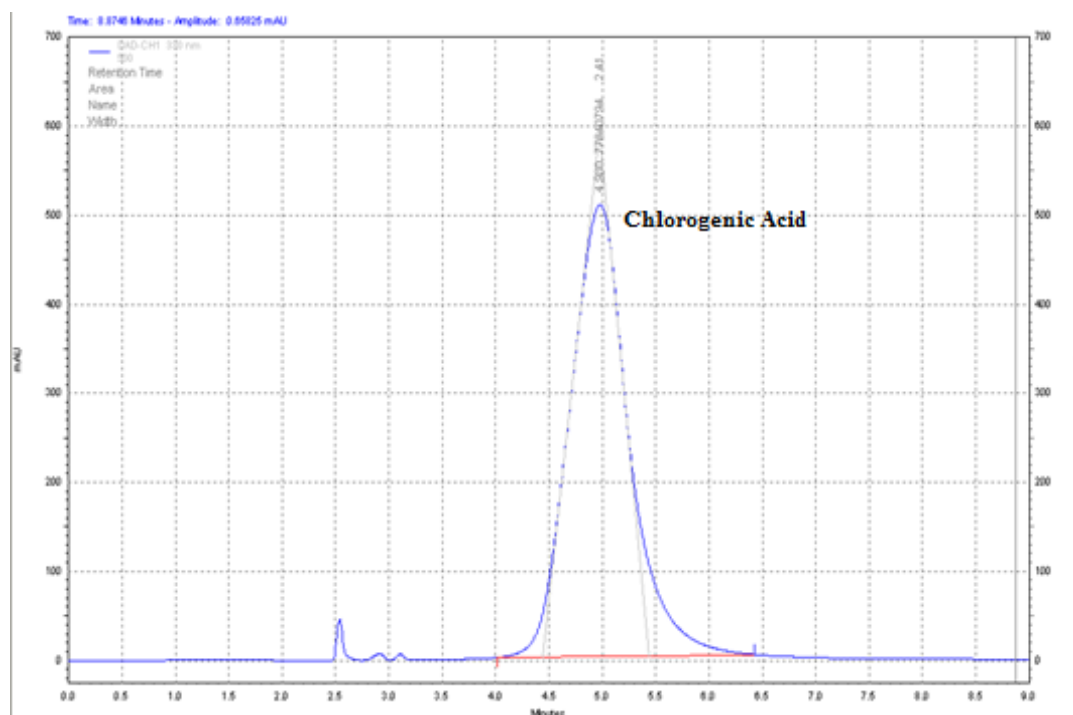

Figure S3: HPLC-DAD chromatogram of CGA standard dissolved in MeOH (Rt = 4.98 min,  $\lambda$  = 330 nm)

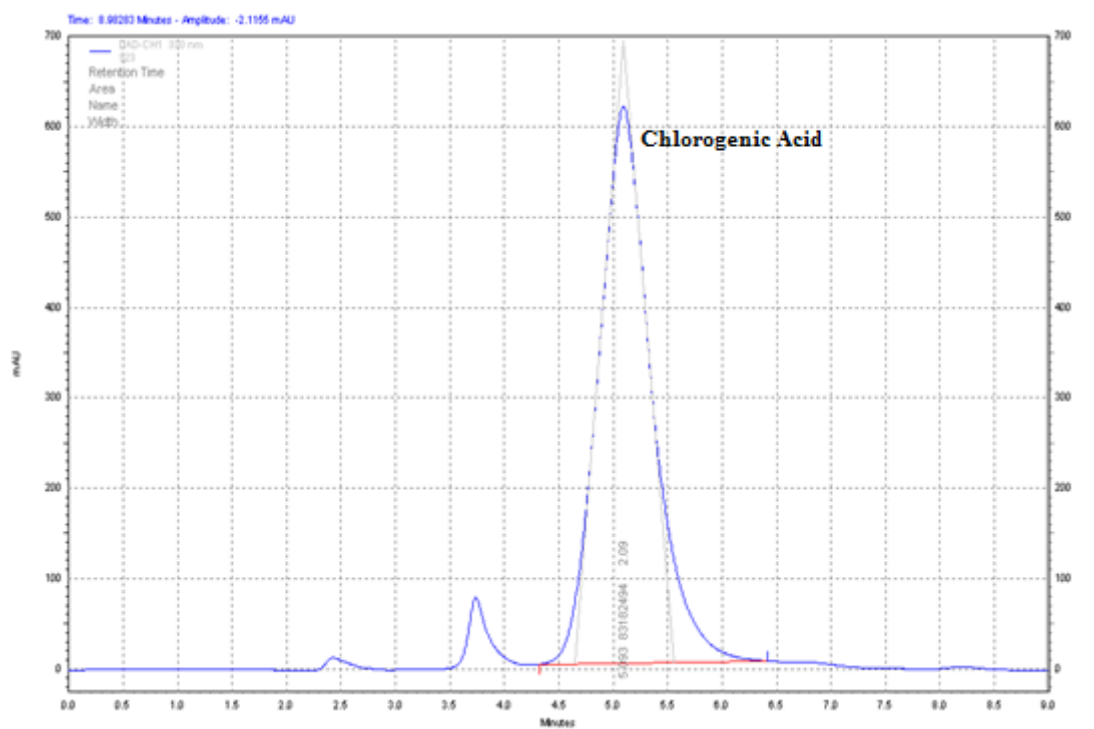

Figure S4: HPLC-DAD chromatogram of CGA extract sample (Rt = 5.09 min,  $\lambda$  = 330 nm)
